# Supplementary material
Source: publisher figshare collection journal article supplement (https://acs.figshare.com/ndownloader/files/4004242)

## **Supporting Information**

### **Antimicrobial action of copper is amplified *via* inhibition of heme biosynthesis**

Karrera Y. Djoko\* and Alastair G. McEwan

School of Chemistry and Molecular Biosciences,

The University of Queensland,

St Lucia, QLD 4072,

Australia

**Supplementary Figure 1. Cu treatment led to loss of heme during growth in aerated liquid cultures.** Difference pyridine hemochrome spectra (reduced *minus* oxidised) of whole gonococci after growth in the absence (black lines) and presence (red lines) of 30  $\mu\text{M}$   $\text{Cu}(\text{NO}_3)_2$ . Three independent replicates are shown for each sample.

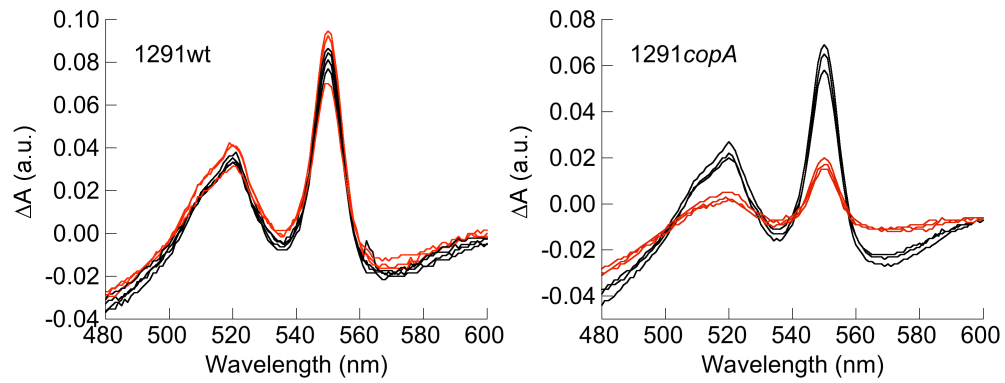

**Supplementary Figure 2. Cu treatment led to bleaching of the characteristic orange-red pigment of *N. gonorrhoeae*.** 1291*copA* was grown in aerated liquid cultures for 5 hours in the absence (-Cu) and presence (+Cu) of 30  $\mu$ M Cu(NO<sub>3</sub>)<sub>2</sub>. a) Whole gonococcal pellets were harvested by centrifugation and washed 3 times with PBS before the picture was taken under ambient light conditions. b) Cytoplasmic membrane proteins were isolated as described below and the picture was taken under ambient light conditions.

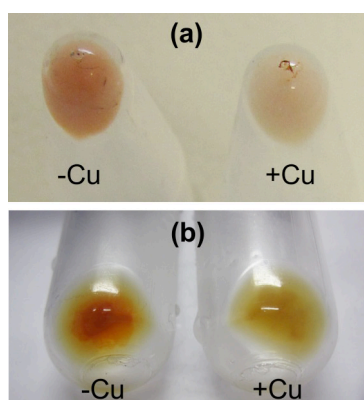

#### *Isolation of cytoplasmic membranes*

Gonococci were grown in large aerated broth cultures (500 mL in 2.5 L flasks) with and without 30  $\mu$ M Cu(NO<sub>3</sub>)<sub>2</sub> for 5 hours. Cells were collected by centrifugation and washed with PBS (2 x 50 mL). The pellet was resuspended in PBS (15 mL) and disrupted by passage through a French Press cell (3 x 15,000 psi). Insoluble cell debris was removed by low-speed centrifugation (4000xg, 30 min, 4 °C). The supernatant was collected and filtered through a 0.45  $\mu$ m polyethylenesulfonate filtration units (MilliPore). Cytoplasmic membrane proteins were separated by high-speed centrifugation (150000xg, 3 h, 4 °C), homogenised in PBS (1 mL), and stored at 4 °C until further analyses. All analyses were performed within 2 days of preparations.

**Supplementary Figure 3. Cu treatment led to loss of heme from cytochromes.** a) Protein expression profiles of isolated cytoplasmic membranes from 1291*copA* after 5 hours of growth in the absence (-Cu) and presence (+Cu) of 30  $\mu\text{M}$   $\text{Cu}(\text{NO}_3)_2$ . No obvious difference was detected in the banding pattern. b) The gel from panel a) was stained for heme-dependent peroxidase activity as described below. A global loss of the heme cofactor was detected from all cytochrome subunits. (a-b) Each lane contained between 2.5-20  $\mu\text{g}$  of proteins as indicated. Approximate positions of size standards are shown in kDa.

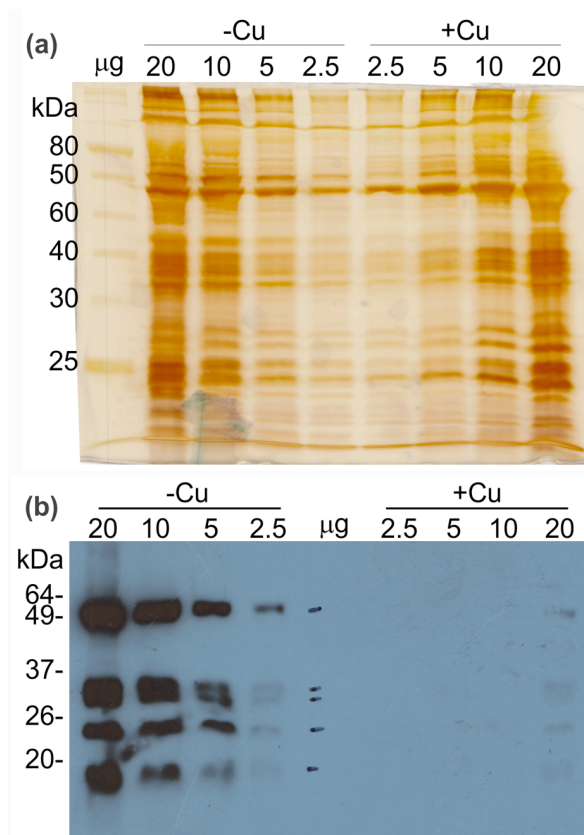

#### *Heme-dependent peroxidase activity stain*

Homogenised cytoplasmic membranes were separated on a 12% SDS PAGE gel under non-reducing conditions (no added DTT). Between 2.5-20  $\mu\text{g}$  of membranes were loaded on each lane as indicated. All electrophoresis steps were performed using standard Tris-Glycine buffer (100 V, 4 °C). Gels were pre-run for ca. 1 h to remove gel casting contaminants. Proteins were resolved for ca. 3

hours until the dye front reached the bottom of the gel. Gels were developed by silver staining following standard procedures. For heme-dependent peroxidase activity staining, proteins were transferred to a nitrocellulose membrane (20 V, 4 °C, 16 hours). The membrane was immersed in SuperSignal West Femto® chemiluminescent substrate (Pierce) and visualised immediately by exposure to film (Fuji Film).

**Supplementary Figure 4. Cu treatment led to loss of heme during a) microaerobic growth in liquid cultures and b) on solid media.** a) Difference pyridine hemochrome spectra (reduced *minus* oxidised) of whole gonococci after microaerobic growth in the absence (black lines) and presence (red lines) of 5  $\mu\text{M}$   $\text{Cu}(\text{NO}_3)_2$ . Three independent replicates are shown for each sample. b) Gonococcal pre-cultures were re-suspended in PBS to an  $\text{OD}_{600}$  of 0.4. Approximately 1 mL of this suspension was spread on solid GC (Oxoid) media containing 0  $\mu\text{M}$  (black lines) or 20  $\mu\text{M}$   $\text{Cu}(\text{NO}_3)_2$  (red lines). Any excess liquid was removed by pipetting. Bacteria were incubated at 37 °C and 5%  $\text{CO}_2$  for 24 hours. Bacteria were harvested and washed with PBS (2 x 20 mL) prior to heme extraction. Difference pyridine hemochrome spectra (reduced *minus* oxidised) are presented below. Three independent replicates are shown for each sample.

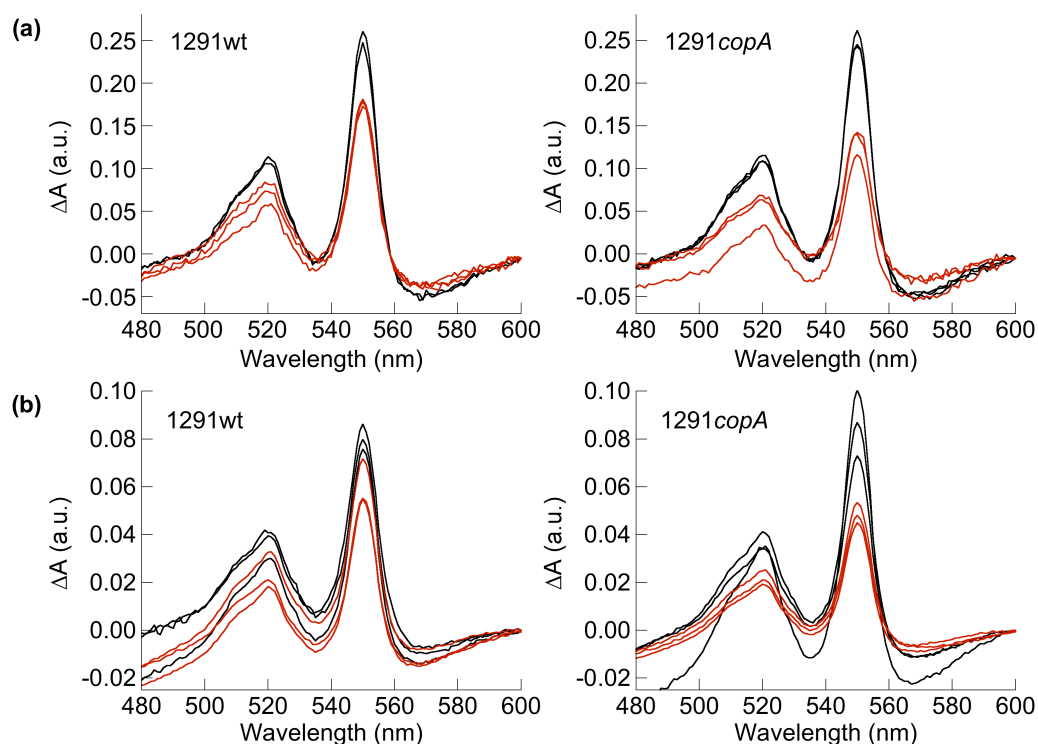

**Supplementary Figure 5. Effects of various treatments on Cu toxicity during growth on solid media.** Gonococcal pre-cultures were resuspended in PBS to an OD<sub>600</sub> of 0.4 (approximately 1 x 10<sup>8</sup> colony forming units/mL) and serially diluted (1:10 steps) in the same buffer. Exactly 5 µL of each dilution was dropped on fresh GC solid media (Oxoid) containing the various concentrations of Cu(NO<sub>3</sub>)<sub>2</sub> and a) 10 µM hemin; b) 10 µM FeCl<sub>3</sub>; c) 100 µM ALA; and d) 2.5 µM Proto IX as indicated. Bacteria were incubated for 24 h at 37 °C/5% CO<sub>2</sub> until colonies were visible.

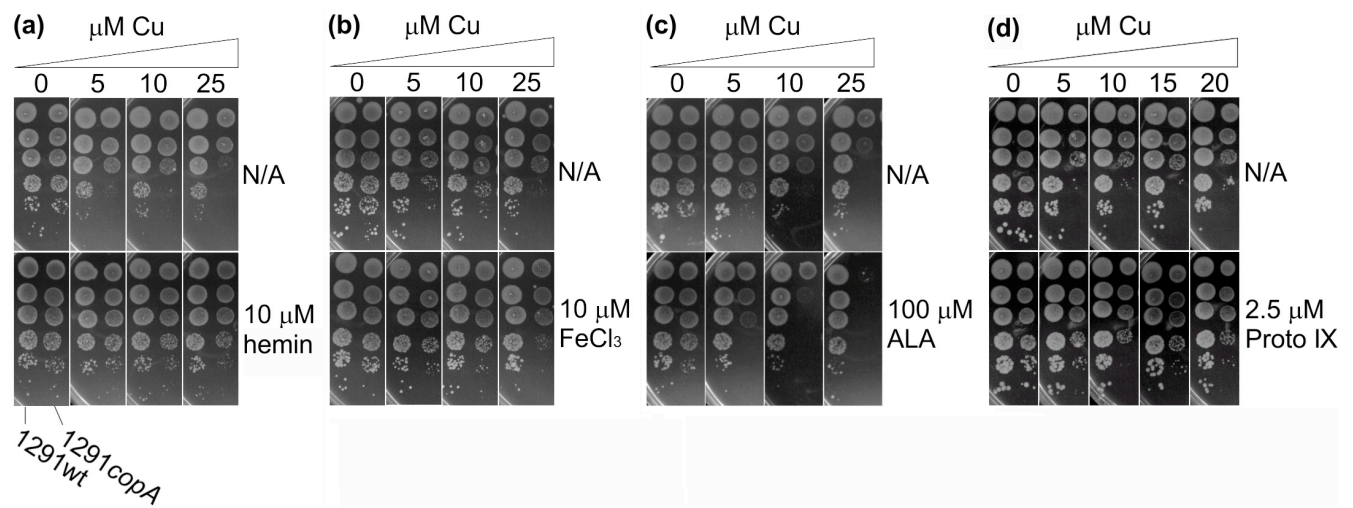

**Supplementary Figure 6. Effects of various treatments on Cu toxicity during growth in aerated liquid cultures.** Growth of gonococci without (empty icons ○ and ◇) and with (filled icons ● and ◆) 30  $\mu\text{M}$   $\text{Cu}(\text{NO}_3)_2$  in the absence (circles ○ and ●) and presence (diamonds ◇ and ◆) of a) 1  $\mu\text{M}$  hemin, b) 0  $\mu\text{M}$  added  $\text{FeCl}_3$  (Fe-depleted), c) 40  $\mu\text{M}$  added  $\text{FeCl}_3$  (Fe-enriched), d) 100  $\mu\text{M}$  ALA, or e) 1  $\mu\text{M}$  Proto IX.

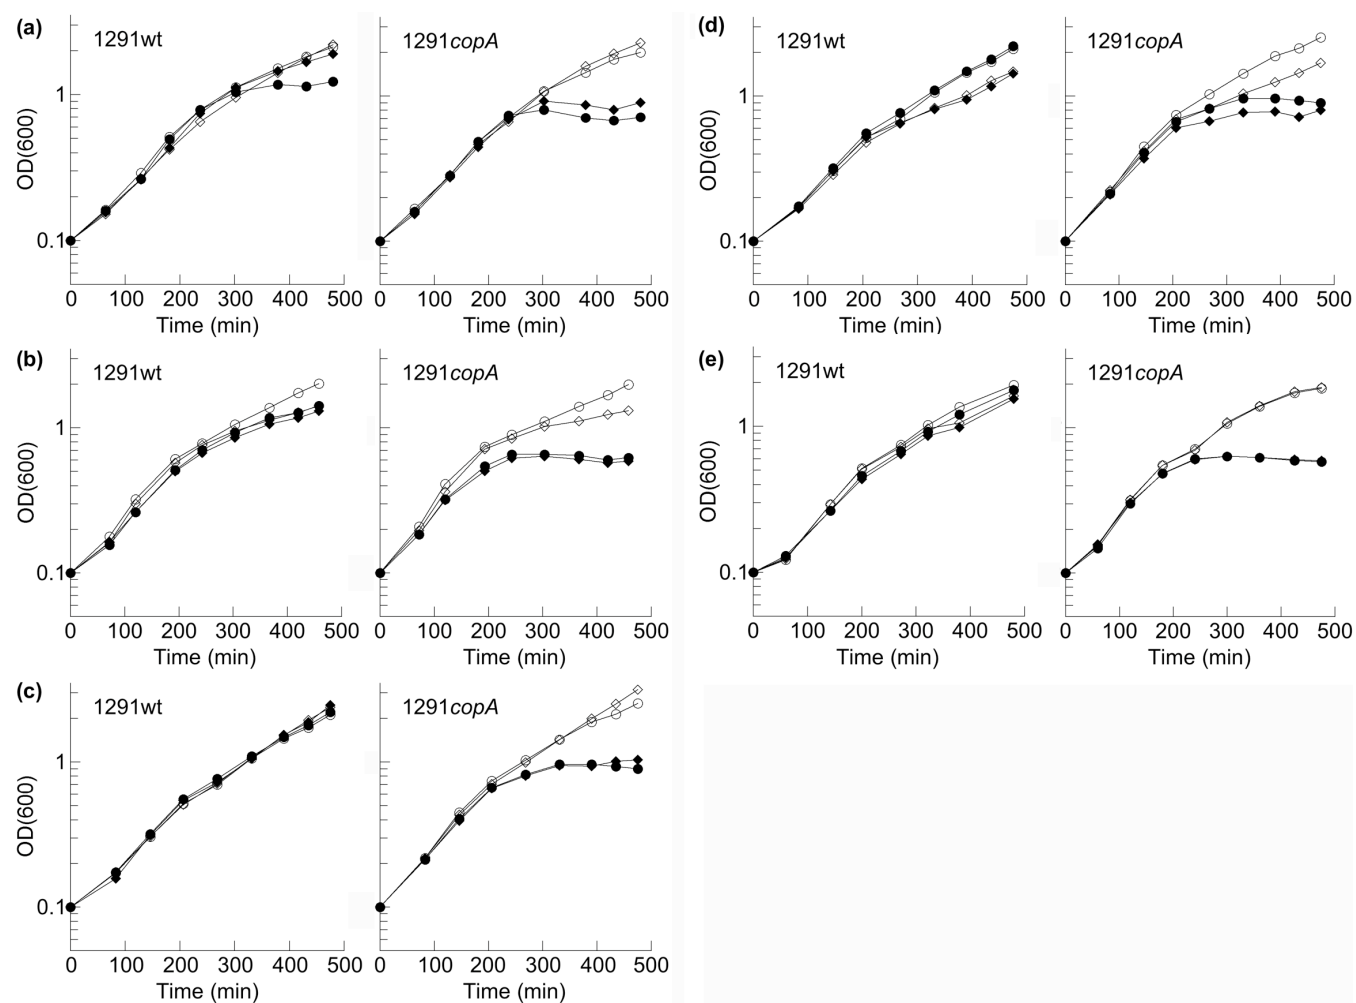



**Supplementary Figure 7. Effects of Cu overloading on the intracellular levels of Cu, Fe, Zn, Mn, Ni, or Co.** Intracellular concentrations of various transition metals in gonococci after 5 hours of aerobic growth in the absence (-Cu) and presence (+Cu) of 30  $\mu$ M  $\text{Cu}(\text{NO}_3)_2$ . Six independent replicates are shown for each sample. \* $P = 0.0001$ , \*\* $P = 0.002$ , \*\*\* $P = 0.03$ , # $P = 0.04$ , ## $P = 0.01$  by two-tailed Student's  $t$ -test. All others had  $P > 0.1$ .

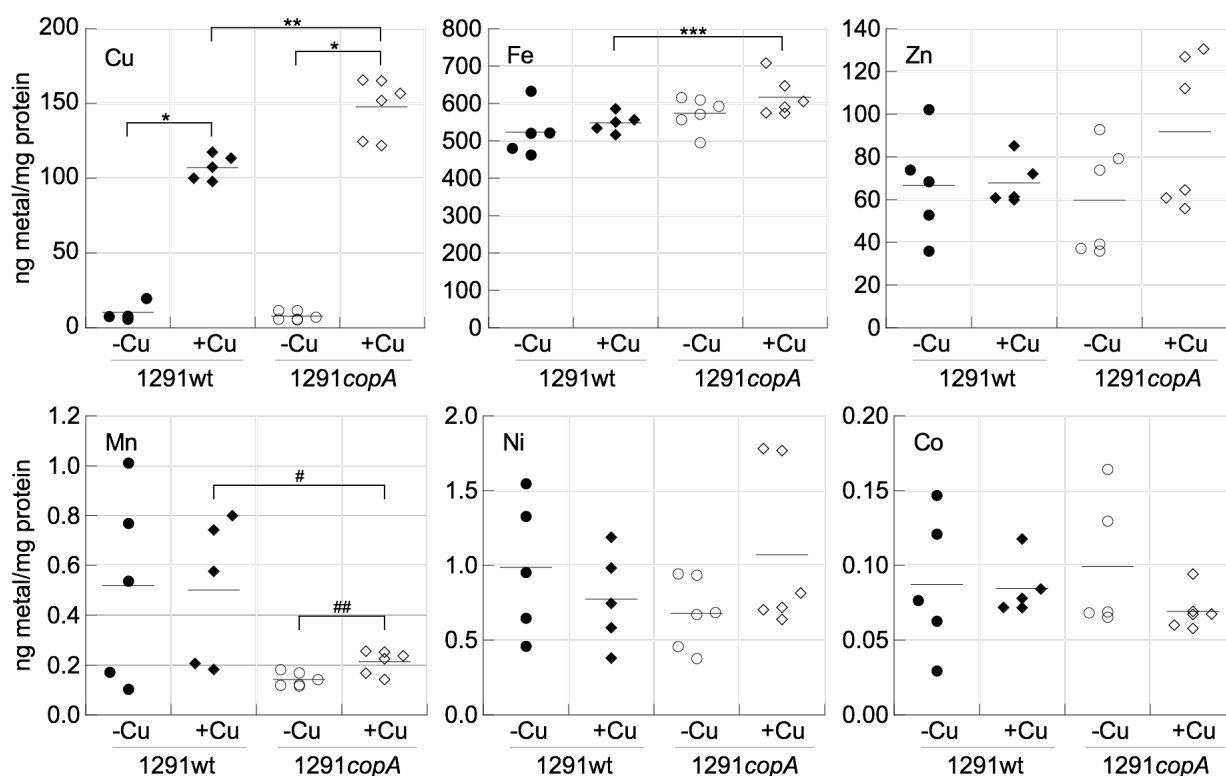

**Supplementary Figure 8. Cu treatment led to the accumulation of Cop III.** Gonococci were grown aerobically for 5 hours in the absence (-Cu) and presence (+Cu) of 30  $\mu\text{M}$   $\text{Cu}(\text{NO}_3)_2$ . a) Orange-red fluorescence of whole gonococci under UV light. (b-e) Effects of various growth conditions on Cop III production. Fluorescence of acetone/HCl extracts. Bacteria were grown aerobically without any additional treatment (-) or with: b) 40  $\mu\text{M}$   $\text{FeCl}_3$  (+Fe) or 1  $\mu\text{M}$  hemin (+h); c) 0  $\mu\text{M}$   $\text{FeCl}_3$  (-Fe), d) 1  $\mu\text{M}$  Proto IX (PPIX); or e) 100  $\mu\text{M}$  ALA.

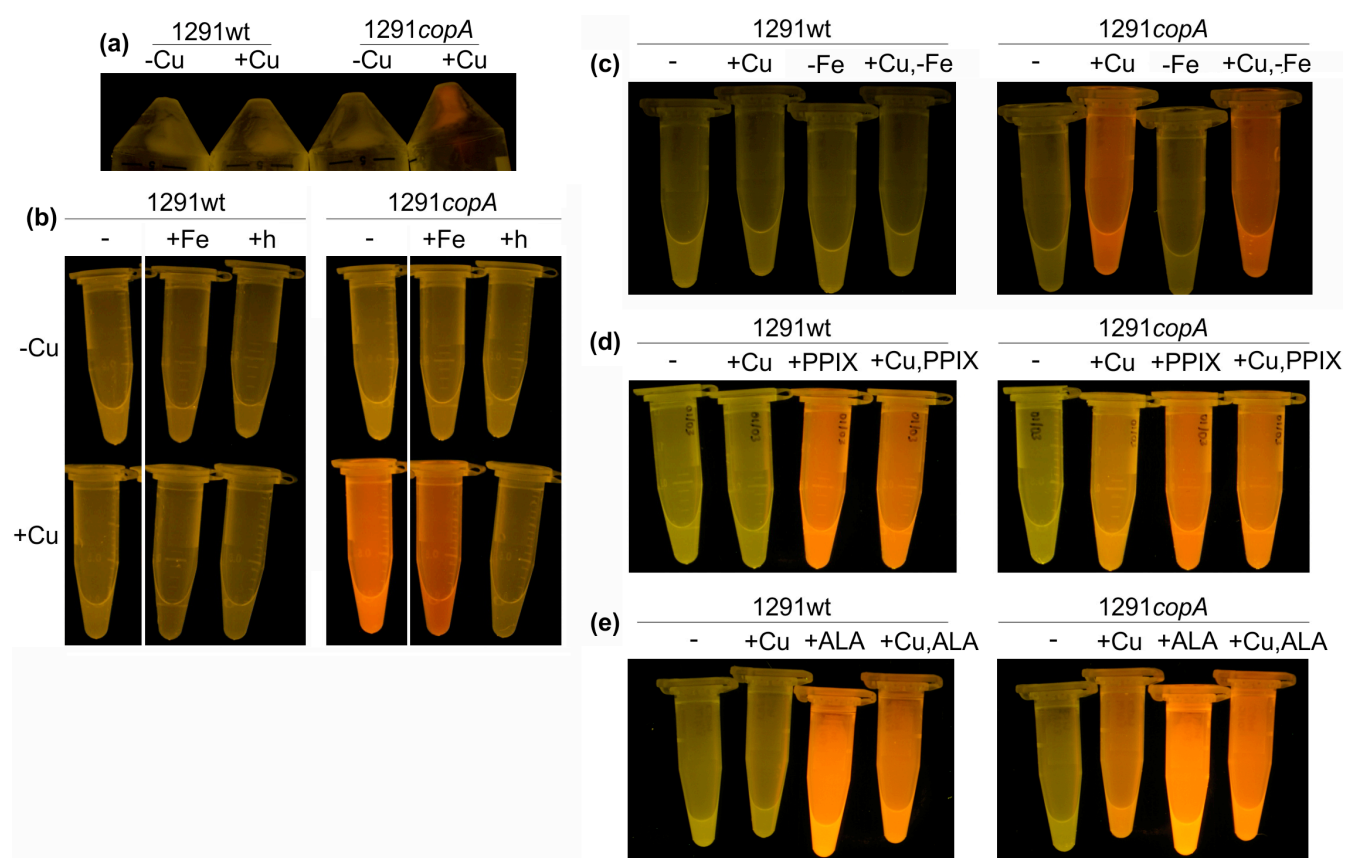

Supplement: Supplementary file 1 [file 4004242]
